# Supplementary material for: Dual-carbon Na-ion capacitors: progress and future prospects
Source: Royal Society of Chemistry journal article supplement (doi:10.1039/d0ta12099e), 2021-01-01
Supplement: d0ta12099e1.xlsx [file d0ta12099e1.xlsx]

## Sheet: Summary
Paper title	Year	Material fabricated	Mode of synthesis	Counter electrode used	Electrolyte used	Initial capacity	Capacity after cycling	Maximum energy density	Maximum power density	Voltage range (V)	Mass
Battery type														Ref no in work
Graphite MCMB
High-Power Na-Ion and K-Ion Hybrid Capacitors Exploiting Co-Intercalation in Graphite Negative Electrodes	2019	Graphite	Commercially obtained	activated carbon (cathode- commercially obtained)	1M NaPF6 in diglyme 1M KPF6 in diglyme	83 mAh g-1 at 2 A g-1 80 mAh g-1 at 2 A g-1 (wrt mass of graphite)	65.12 mAh g-1 after 5000 cycles at 15 A g-1 64.6 mAh g-1 after 5000 cycles at 15 A g-1	60.5 Wh kg-1 57.8 Wh kg-1	17127 W kg-1 15887 W kg-1	0.0-3.9	Mass of anode and cathode active materials	a		52
High energy density sodium-ion capacitors through co-intercalation mechanism in diglyme-based electrolyte system	2015	mesocarbon microbead graphite (MCMB graphite)	Commercially obtained	activated carbon (cathode- commercially obtained)	1M NaPF6 in diglyme	37.4 mAh -1 at 1 A g-1	22.5 mA g-1 after 1500 cycles at 1 A g-1	93.5 Wh kg-1	2832 W kg-1	1.0-4.0		b		50
Hard carbon
A Quasi-Solid-State Sodium-Ion Capacitor with High Energy Density	2015	3D macro graphene	a microwave-assisted electro- chemical exfoliation in aqueous electrolyte combined with hard template method	Nanosized disordered carbon (carbonization-activation of polypyrrole (PPy) with KOH)	Na conducting gel polymer electrolyte	49 F g-1 at 1 A g-1	~42 F g-1 after 1200 cycles at 1 A g-1	168 Wh kg-1	2632 W kg-1	0.5-4.2	Total mass of posititve and negative electrodes	c		56
Lithium and sodium ion capacitors with high energy and power densities based on carbons from recycled olive pits	2017	Activated carbon	Pyrolysis of olive pits followed by activation with KOH	Hard carbon (pyrolysis of olive pits)	1 M LiPF6 in EC:PC 1 M NaPF6 in EC:PC	not available	94% of initial capacity at 2A g-1 after 10000 cycles 40% of initial capacity at 2 A g-1 after 10000 cycles	100 Wh kg-1 NA	150 Wh kg-1 NA	1.5-4.2	Total mass of active materials of cathode and anode		4
MgO-templated carbon as a negative electrode material for Na-ion capacitors	2016	MgO- templated carbon (anode)	Annealing MgO and polyvinyl alcohol followed by acid washing	Activated carbon (commercially obtained)	1 M NaPF6 in PC with 2% FEC	not available	90% of initial energy density after 1000 cycles	31 Wh L-1	11.8 kW L-1	1.7-3.7	Total weight of the electrodes		5
Molecular cooperative assembly-mediated synthesis of ultra-high-performance hard carbon anodes for dual-carbon sodium hybrid capacitors	2019	Hard carbon (MG-1-600)	Mixing glucose and hydrogen bonded melamine and cyanuric acid complex , followed by pyrolysis	Activated carbon fiber (commercially obtained)	1 M NaClO4 in EC:PC	4.93 F cm-3 at 10 mA cm-3	4.72 F cm-3 at 10 mA cm-3 after 10000 cycles	2.89 mWh cm-3	160 mW cm-3	0.5-2.0			6
Na-ion capacitor using sodium pre-doped hard carbon and activated carbon	2012	MCMB Hard carbon Hard carbon	Commercially obtained	activated carbon (commercially obtained)	1 M LiPF6 in EC:DEC " " " 1 M NaPF6 in EC:DEC	not available	~97% of initial capacity at 2 mA cm-2 after 1000 cycles ~91% on initial capacity at 2 mA cm-2 after 1000 cycles	Not available	Not available	1.7-3.7			7
Peanut shell hybrid sodium ion capacitor with extreme energy-power rivals lithium ion capacitors	2015	Peanut shell ordered carbon	Carbonisation followed by mild air activation	Peanut shell nanosheet carbon (Hydrothermal reaction followed by KOH activation)	1 M NaClO4 in EC:DMC	not available	~90% after 1,00,000 cycles at 51.2 A g-1	214 Wh kg-1	16.5 kW kg-1	1.5-4.2	Total mass of active materials of cathode and anode	d		59
Sodium-ion capacitors with superior energy-power performance by using carbon-based materials in both electrodes	2020	polyimide/graphene oxide-derived carbon (PIGC)	Hydrothermal reaction followed by pyrolysis	N, B-codoped expanded reduced graphite oxide (NBEG) (Pristine expanded graphite was heated with boric acid and NH3 to prepare NBEG)	1 M NaClO4 in EC:DMC	31.5 mAh g-1 at 4 A g-1	33 mAh g-1 after 2000 cycles at 4 A g-1	81 Wh kg-1	9500 W kg-1	0.0-4.2	Mass of anode material	e		60
Carbon nanosheets
Asymmetric Energy Storage Devices Based on Surface-Driven Sodium-Ion Storage	2017	Hierarchially porous carbon nanowebs (HP-CNW)	Incubation of bacteria, freeze drying and pyrolysis	Functionalised microporous carbon nanosheets (FM-CNS) (solvation, freeze drying, followed by pyrolysis	1 M NaPF6 in EC:PC	61.3 mAh g-1 at 100 mA g-1	83.4% after 3000 cycles at 500 mA g-1	131 Wh kg-1	15260 W kg-1	0.4-4.2		f		61
Tremella-like N,O-codoped hierarchically porous carbon nanosheets as high performance anode materials for high energy and ultrafast Na-ion capacitors	2017	Tremella-like hierarchically porous carbon nanosheets (HPCNS)	Pre-carbonization followed by carbonisation coupled with KOH activation	Hierarchially porous carbon (Carbonisation of cattle bones followed by combined KOH activation and pyrolysis)	1 m NaClO4 in EC:DMC+FEC (5 Vol%)	not available	85.8% after 4000 cycles at 3.5 A g-1	105.2 Wh kg-1	60.4 kW kg-1	0.0-4.0	Total mass of active materials of cathode and anode	g		62
High and ultra-stable energy storage from all-carbon sodium-ion capacitor with 3D framework carbon as cathode and carbon nanosheet as anode	2020	Bio-waste pine cone shell derived carbon sheets (PSCS)	Pre-carbonization followed by carbonisation coupled with KOH activation	(4,4′-(4-oxophthalazine-1,3(4H)-diyl)dibenzonitrile covalent triazine-based frameworks (OPDN-CTF-A) (ionothermal strategy)	1 m NaClO4 in EC:DEC+FEC (5 Vol%)	not available	~90.7% capacitance after 10000 cycles at 10 A g-1	111 Wh kg-1	14200 W kg-1	1.5-4.2	Total mass of active materials of cathode and anode	h		63
Modulating the defects of graphene blocks by ball-milling for ultrahigh gravimetric and volumetric performance and fast sodium storage	2020	Dense graphene blocks	Planetary ball milling	Activated carbon (cathode- commercially obtained)	1M NaCF3SO3 in diglyme	~65 F g-1 at 2A g-1	85% capacity after 3000 cycles at 2 A g-1	97 Wh kg-1	14205 W kg-1	0-3.2	Total mass of active materials of cathode and anode	i		64
Carbon nanofiber/sphere
Ultra-Thin Hollow Carbon Nanospheres for Pseudocapacitive Sodium-Ion Storage	2015	Ultra-thin hollow carbon nanospheres (UTH-CNs)	Template based method followed by pyrolysis	activated carbon (commercially obtained)	1 M NaClO4 in PC	not available	70% initial capacitance after 1000 cycles at 300 mA g-1	110 Wh kg-1	10 kW kg-1	0.5-4.0	Total mass of anode and cathode	j		65
A high-energy sodium-ion capacitor enabled by a nitrogen/sulfur co-doped hollow carbon nanofiber anode and an activated carbon cathode	2019	Nitrogen, sulfur co-doped hierarchal hollow carbon nanofibers (N/S-HCNFs)	Solution based method followed by pyrolysis	activated carbon (commercially obtained)	1 m NaClO4 in EC:DMC+FEC (5 wt.%)	60 mAh g-1 at 2 Ag-1	81% of initial capacity after 3000 at 2 A g-1	116.4 Wh kg-1	20 kW kg-1	0.0-4.0	Total mass of active materials of cathode and anode	k		66
Capacitor type
Li-ion vs. Na-ion capacitors: A performance evaluation with coconut shell derived mesoporous carbon and natural plant based hard carbon	2017	Coconut shell derived mesoporous carbon (CS-AC)	hydrothermal treatment of coconut shell precursor at 200˚C for 20 min and subsequent physiochemical activation using ZnCl2 and CO2 as chemical and physical activating agents.	commercially available natural plant based HC	1 M NaClO4 in EC:DMC	not available	60% retention after 8000 cycles with 97% efficiency at 1.5 A g-1	82 Wh kg-1	8 kW kg-1	1.4-3.9	Total mass of active materials of cathode and anode(mass loading 1:2.2)	l		67
Symmetric electrodes (without modification)							.
Excellent energy – power characteristics from a hybrid sodium ion capacitor based on identical carbon nanosheets in both electrodes		peanut skin-derived carbon nanosheets (SCN-A)	simultaneous carbonization and activation	Same as anode	1 M NaClO4 in EC:DEC	not available	85% retention after 3000 cycles at 5 A g-1	112 Wh kg-1	12 kW kg-1	0.0-4.0	Total mass of active materials of cathode and anode	m		69
Waste-Driven Bio-Carbon Electrode Material for Na-Ion Storage Applications		corn silk derived activated carbon (CSC)	Pre-carbonization followed by carbonisation coupled with KOH activation	Same as anode	1M NaClO4 in EC: PC	not available	68% retention after 300 cycles at 1 A g-1	109 Wh kg-1	12.16 kW kg-1	0.01-2.5		n		70
Sodium-Ion Diffusion and Charge Transfer Kinetics of Sodium-Ion Hybrid Capacitors Using Bio-Derived Hierarchical Porous Carbon		hierarchical porous carbon (j-HPC)	Pre-carbonisation, low-temperature KOH activation, followed by high-temperature carbonisation	Same as anode	1M NaPF6 in EC:DEC	~35 mAh g-1 at 0.5 A g-1	90.5% retention after 5000 cycles at 0.5 A g-1	116 W h kg-1	11.121kW kg-1	1.0-3.8	Total mass of active materials of cathode and anode	o		71
Surface-Functionalized Graphene-Based Quasi-Solid-State Na-Ion Hybrid Capacitors with Excellent Performance		surface oxygen -functionalized crumbled graphene (OCG)	Low-temperature calcination of composite material fabricated by in-situ grown Zinc oxide nanosheets (ZnO) on the surface of GO	Same as anode	Na conducting gel polymer electrolyte	not available	86.7% retention after 2500 cycles at 0.5 A g-1	121.3 Wh kg-1	8000 W kg-1	0.5-3.5	Total mass of active materials of cathode and anode	p		72
Surface Enriched Graphene Hollow Spheres towards Building Ultra-High Power Sodium-Ion Capacitor with Long Durability		Highly interconnected graphene hollow nanospheres (GHNS) with dual heteroatoms - nitrogen (N) and sulfur (S)	sacrificial template method for the self-assembly of N and S doped 2D graphene into 3-D hollow architecture	Same as anode	1 M NaClO4 in EC:DEC		85% retention after 10000 cycles at 5 A g-1	121 Wh kg-1	51 kW kg-1	1.5-4.2	Total mass of active materials of cathode and anode	q		73
Symmetric electrodes (with modification)
Porous Carbons with Tailored Heteroatom Doping and Well-Defined Porosity as High-Performance Electrodes for Robust Na-Ion Capacitors		N, O co-doped hierarchically porous carbon materials (HPC - 800)	precarbonisation followed by pyrolysis coupled with KOH+hydroxyapatite activation at 800 C	N, O co-doped hierarchically porous carbon materials (HPC - 550 - precarbonisation followed by pyrolysis coupled with KOH+hydroxyapatite activation at 500C)	1M NaClO4 in EC: PC with 5% FEC	not available	81.1% retention after 2500 cycles at 3.5 A g-1	103.2 Wh kg-1	15.9 kW kg-1	0.0-4.0	Total mass of active materials of cathode and anode	r		74
High-Performance Sodium-Ion Capacitor Constructed by Well-Matched Dual-Carbon Electrodes from a Single Biomass		garlic-derived porous carbon (GDPC)	Simple carbonization of garlic, followed by the traditional KOH activation method	garlic-derived hard carbon (GDHC - Carbonisation of garlic at high temperatures)	1 M NaClO4 EC:DEC with 5% FEC	not available	73% retention after 10000 cycles at 30 A g-1	156 Wh kg-1	38.910 kW kg-1	1.5-4.2		s		75
Gas Expansion-Assisted Preparation of 3D Porous Carbon Nanosheet for High-Performance Sodium Ion Hybrid Capacitor		hierarchically porous carbon (HPC)	chemical gas expansion and chemical etching process	3-D N, S co-doped porous carbon nanosheet (PCNS - chemical gas expansion and chemical etching process )	1 M NaClO4 EC:DMC with 5% FEC	not available	82% retention after 8000 cycles at 5 A g-1	119 W h kg-1	20 kW kg-1	1.5-4.2	Total mass of active materials of cathode and anode	t		76
All-Cellulose-Based Quasi-Solid-State Sodium-Ion Hybrid Capacitors Enabled by Structural Hierarchy		coral-shape N-doped carbons (CHKM800)	Direct thermal pyrolysis of cellulose nanocrystals	nonporous hard carbon (CNC1000 - Direct thermal pyrolysis of cellulose nanocrystals)	Hydroxyethylcellulose based gel polymer electrolyte	58.2 mAh g-1 at 0.2 Ag-1	not available	139 Wh kg-1	3240 W kg-1	1.5-4.2	Total mass of active materials of cathode and anode	u		77

## Sheet: Energy and power
Energy and Power
Paper	Classification	Anode									Cathode									Capacitor properties
		Name	Synthesis	Morphology	Presence of functional groups	Nano (Y/N)	Surface area	Rate of max energy	Max energy density	Power at max energy	Name	Synthesis	Morphology	Presence of functional groups	Nano (Y/N)	Surface area	Rate of max power	Max power density	Energy at max power	Symmetric (Y/N)	Electrolyte	Double activation	Voltage range	Mass considered	Pre-sodiation (Y/N)
High-Power Na-Ion and K-Ion Hybrid Capacitors Exploiting Co-Intercalation in Graphite Negative Electrodes (graphite MCMB)	Graphite MCMB	Micro-sized graphite	commercial	Graphitic structure	No	No	7.24 m2 g-1	NA	60.5	1422 W kg-1	Activated carbon	Commercial (AC- YP-47, Kuraray)	NA	No	No	NA	NA	17127	21.8 Wh kg-1	No	1M NaPF6 in diglyme	No	0-3.9 V	Mass of anode and cathode active materials	No	1
High energy density sodium-ion capacitors through co-intercalation mechanism in diglyme-based electrolyte system (Graphite MCMB)	Graphite MCMB	mesocarbon microbead graphite (MCMB graphite)	commercial	Graphitic structure	No	No	NA	4C	93.5	573 W kg-1	Activated carbon	Commercial (AC- YP50F, Kuraray)	NA	No	No	1373 m2 g-1	20 C	2832	86.5 Wh kg-1	No	1M NaPF6 in diglyme	No	1-4 V	NA	Yes	2
A Quasi-Solid-State Sodium-Ion Capacitor with High Energy Density	hard carbon	Nanosized disordered carbon	carbonization-activation of polypyrrole (PPy) with KOH	Nanoporous structure	No	Yes	583 m 2 g −1	NA	168	~550 W kg-1	3D macro graphene	a microwave-assisted electro- chemical exfoliation in aqueous electrolyte combined with hard template method	Nanosheets	No	yes	615 m 2 g −1	NA	2632	~45 Wh kg-1	No	Na conducting gel polymer electrolyte	No	0.5-4.2 V	Total mass of posititve and negative electrodes	NA	3
Peanut shell hybrid sodium ion capacitor with extreme energy-power rivals lithium ion capacitors	hard carbon	Peanut shell ordered carbon	Carbonisation followed by mild air activation	macroscopically open sponge	Yes- N,O	No	476 m2g-1	NA	214	NA	Peanut shell nanosheet carbon	Hydrothermal reaction followed by KOH activation	Nanosheet structure	Yes- N,O	Yes	2396 m2g-1	NA	16500	NA	No	1 M NaClO4 in EC:DMC	Yes	1.5-4.2	Total mass of active materials of cathode and anode	Yes - both	4
Sodium-ion capacitors with superior energy-power performance by using carbon-based materials in both electrodes (hard carbon)	hard carbon	(polyimide/graphene oxide)-derived carbon (PIGC)	Hydrothermal reaction followed by pyrolysis	Plate like morphology with graphitised domains	Yes - N,O	No	512 m2 g−1,	NA	81	600 W kg-1	N, B-codoped expanded reduced graphite oxide (NBEG)	Pristine expanded graphite was heated with boric acid and NH3 to prepare NBEG	NA	Yes - N,B	No	NA	NA	9500	55 W h kg-1	No	1 M NaClO4 in EC:DMC	No	0-4.2 V	Mass of anode material	No	5
Asymmetric Energy Storage Devices Based on Surface-Driven Sodium-Ion Storage	Carbon nanosheets	Hierarchically porous carbon nanowebs (HP- CNWs)	Incubation of bacteria, freeze drying and pyrolysis	highly defective pseudographitic layers	Yes - O	Yes	123.2 m2 g−1	0.1 A g-1	131	210 W kg-1	Functionalised microporous carbon nanosheets (FM-CNS)	solvation, freeze drying, followed by pyrolysis	Nanosheets	Yes - N,O	Yes	1,764.8 m2 g−1	8 A g-1	15260	~44 Wh kg-1	No	1 M NaPF6 in EC:PC	No	0.4-4.2 V	NA	Yes - both	6
Tremella-like N,O-codoped hierarchically porous carbon nanosheets as high performance anode materials for high energy and ultrafast Na-ion capacitors	Carbon nanosheets	Tremella-like hierarchically porous carbon nanosheets (HPCNS)	Pre-carbonization followed by carbonisation coupled with KOH activation	3-D tremella-like structure composed of 2-D nanosheets	Yes- N,O	Yes	890.4	NA	105.2	700 W kg−1	Hierarchially porous carbon	Carbonisation of cattle bones followed by combined KOH activation and pyrolysis	a 3D hierarchical honeycomb porous structure with interconnected pores containing open macropores and channel mesopores	Yes- N,O	Yes	2520 m 2g -1	NA	60400	32.5 W h kg−1	No	1 m NaClO4 in EC:DMC+FEC (5 Vol%)	Yes	0.0-4.0 V	Total mass of active materials of cathode and anode	Yes-anode	7
High and ultra-stable energy storage from all-carbon sodium-ion capacitor with 3D framework carbon as cathode and carbon nanosheet as anode	Carbon nanosheets	Bio-waste pine cone shell derived carbon sheets (PSCS)	Pre-carbonization followed by carbonisation coupled with KOH activation	carbon nanosheet structure with long-range disordering	NA	Yes	63.3	NA	111	40 W kg-1	(4,4′-(4-oxophthalazine-1,3(4H)-diyl)dibenzonitrile covalent triazine-based frameworks (OPDN-CTF-A)	ionothermal strategy	abundant and homogeneous pores without pseudo-graphite layered structure	Yes - N,O	No	687.4	NA	14200	86 Wh kg-1	No	1 m NaClO4 in EC:DEC+FEC (5 Vol%)	No	1.5-4.2 V	Total mass of active materials of cathode and anode	Yes - both	8
Modulating the defects of graphene blocks by ball-milling for ultrahigh gravimetric and volumetric performance and fast sodium storage	Carbon nanosheets	Dense graphene blocks	Planetary ball milling	broken and distorted lattice with abundant de- fects	Yes - O	Yes	65.8 m2 g?1	NA	97	318	Activated carbon	commercially obtained (AC- YP-80, Kuraray)	NA	NA	No	NA	NA	14205	45	No	1M NaCF3SO3 in diglyme	No	0-3.2 V	Total mass of active materials of cathode and anode	NA	9
Ultra-Thin Hollow Carbon Nanospheres for Pseudocapacitive Sodium-Ion Storage	carbon nanofiber/sphere	Ultra-thin hollow carbon nanospheres (UTH-CNs)	Template based method followed by pyrolysis	Hollow morphology	Yes - N,O	Yes	400 m2 g?1	NA	110	245 Wkg?1	activated carbon	commercially obtained	NA	NA	No	NA	NA	10000	43 Whkg?1	No	1 M NaClO4 in PC	No	0.5-4.0 V	Total mass of anode and cathode	Yes - anode	10
A high-energy sodium-ion capacitor enabled by a nitrogen/sulfur co-doped hollow carbon nanofiber anode and an activated carbon cathode	carbon nanofiber/sphere	Nitrogen, sulfur co-doped hierarchal hollow carbon nanofibers (N/S-HCNFs)	Solution based method followed by pyrolysis	nanofibers with hollow structure	Yes - N, S	Yes	397.7 m2 g?1	NA	116.4	200Wkg?1	activated carbon	commercially obtained	NA	NA	No	NA	NA	20000	48.2 W h kg?1	No	1 m NaClO4 in EC:DMC+FEC (5 wt.%)	No	0.0-4.0 V	Total mass of active materials of cathode and anode	Yes - anode	11
Li-ion vs. Na-ion capacitors: A performance evaluation with coconut shell derived mesoporous carbon and natural plant based hard carbon (Capacitor type)	Capacitor type	natural plant based HC	commercial	NA	No	No	NA	NA	82	NA	Coconut shell derived mesoporous carbon (CS-AC)	hydrothermal treatment of coconut shell precursor at 200˚C for 20 min and subsequent physiochemical activation using ZnCl2 and CO2 as chemical and physical activating agents.	granular shaped particulate	Yes - O	NA	1795 m2 g?1	NA	8000	NA	No	1 M NaClO4 in EC:DMC	No	1.4-3.9 V	Total mass of active materials of cathode and anode(mass loading 1:2.2)	Yes - only HC	12
Excellent energy – power characteristics from a hybrid sodium ion capacitor based on identical carbon nanosheets in both electrodes	Symmetric electrodes (without modification)	peanut skin-derived carbon nanosheets (SCN-A)	simultaneous carbonization and activation	Nanometer-scale sheet like morphology	Yes - N,O	Yes	2070 m2 g-1	NA	112	67	peanut skin-derived carbon nanosheets (SCN-A)	simultaneous carbonization and activation	Nanometer-scale sheet like morphology	Yes - N,O	Yes	2070 m2 g-1	NA	12000	45	Yes	1 M NaClO4 in EC:DEC	Yes	0.0-4.0 V	Total mass of active materials of cathode and anode	Yes- both	13
Waste-Driven Bio-Carbon Electrode Material for Na-Ion Storage Applications	Symmetric electrodes (without modification)	corn silk derived activated carbon (CSC)	Pre-carbonization followed by carbonisation coupled with KOH activation	sheet like structure with random orientation	Yes - N,O	No	2550 m2 g-1	NA	109	1.6 kW kg-1	corn silk derived activated carbon (CSC)	Pre-carbonization followed by carbonisation coupled with KOH activation	sheet like structure with random orientation	Yes - N,O	No	2550 m2 g-1	NA	12160	43.57 Wh kg-1	Yes	1M NaClO4 in EC: PC	Yes	0.01-2.5 V	NA	NA	14
Sodium-Ion Diffusion and Charge Transfer Kinetics of Sodium-Ion Hybrid Capacitors Using Bio-Derived Hierarchical Porous Carbon	Symmetric electrodes (without modification)	hierarchical porous carbon (j-HPC)	Pre-carbonisation, low-temperature KOH activation, followed by high-temperature carbonisation	a granule-like irregular morphology	Yes - N,O	No	2377m2 g?1	NA	116	495.43Wkg?1	hierarchical porous carbon (HPC)	Pre-carbonisation, low-temperature KOH activation, followed by high-temperature carbonisation	a granule-like irregular morphology	Yes - N,O	No	2377m2 g?1	NA	11121	34.78Wh kg?1	Yes	1M NaPF6 in EC:DEC	Yes	1.0-3.8V	Total mass of active materials of cathode and anode	Yes- both	15
Surface-Functionalized Graphene-Based Quasi-Solid-State Na-Ion Hybrid Capacitors with Excellent Performance	Symmetric electrodes (without modification)	surface oxygen -functionalized crumbled graphene (OCG)	Low-temperature calcination of composite material fabricated by in-situ grown Zinc oxide nanosheets (ZnO) on the surface of GO	compact graphene/ZnO composite with porous ZnO nanosheets strongly an- chored on the surface of graphene	Yes - O	yes	254 m2 g−1	NA	121.3	300 W kg−1	surface oxygen -functionalized crumbled graphene (OCG)	Low-temperature calcination of composite material fabricated by in-situ grown Zinc oxide nanosheets (ZnO) on the surface of GO	compact graphene/ZnO composite with porous ZnO nanosheets strongly an- chored on the surface of graphene	Yes - O	yes	254 m2 g−1	NA	8000	51.2 W h kg−1	Yes	Na conducting gel polymer electrolyte	Yes	0.5-3.5 V	Total mass of active materials of cathode and anode	NA	16
Surface Enriched Graphene Hollow Spheres towards Building Ultra-High Power Sodium-Ion Capacitor with Long Durability	Symmetric electrodes (without modification)	Highly interconnected graphene hollow nanospheres (GHNS) with dual heteroatoms - nitrogen (N) and sulfur (S)	sacrificial template method for the self-assembly of N and S doped 2D graphene into 3-D hollow architecture	hollow nanosphere morphology	Yes - N,O, S	Yes	~320m2 g?1	NA	121	100Wkg?1	Highly interconnected graphene hollow nanospheres (GHNS) with dual heteroatoms - nitrogen (N) and sulfur (S)	sacrificial template method for the self-assembly of N and S doped 2D graphene into 3-D hollow architecture	hollow nanosphere morphology of	Yes - N,O, S	Yes	~320m2 g?1	NA	51000	69 Wh kg?1	Yes	1 M NaClO4 in EC:DEC	Yes	1.5-4.2 V	Total mass of active materials of cathode and anode	Yes-both	17
Porous Carbons with Tailored Heteroatom Doping and Well-Defined Porosity as High-Performance Electrodes for Robust Na-Ion Capacitors	Symmetric electrodes (with modification)	N, O co-doped hierarchically porous carbon materials (HPC - 550)	precarbonisation followed by pyrolysis coupled with KOH+hydroxyapatite activation	honeycomb-like structure with rich interconnected macropores	Yes - N,O	yes	594	NA	103.2	70Wkg−1	N, O co-doped hierarchically porous carbon materials (HPC - 800)	precarbonisation followed by pyrolysis coupled with KOH+hydroxyapatite activation	honeycomb-like structure with rich interconnected macropores	Yes - N,O	Yes	3285	NA	15900	22.3Wh kg−1	Yes, with modfication in synthesis	1M NaClO4 in EC: PC with 5% FEC	Yes	0.0-4.0 V	Total mass of active materials of cathode and anode	Yes- anode	18
High-Performance Sodium-Ion Capacitor Constructed by Well-Matched Dual-Carbon Electrodes from a Single Biomass	Symmetric electrodes (with modification)	garlic-derived hard carbon (GDHC)	Carbonisation of garlic at high temperatures	pseudographitic ordering domains in the carbon structure	Yes - N,O, S	No	50	NA	156	355 W kg−1	garlic-derived porous carbon (GDPC)	Simple carbonization of garlic, followed by the traditional KOH activation method	Highly porous structure	Yes - N,O, S	No	1682	NA	38910	31 W h kg−1	Yes, with modfication in synthesis	1 M NaClO4 EC:DEC with 5% FEC	No	1.5-4.2 V	NA	NA	19
Gas Expansion-Assisted Preparation of 3D Porous Carbon Nanosheet for High-Performance Sodium Ion Hybrid Capacitor	Symmetric electrodes (with modification)	3-D N, S co-doped porous carbon nanosheet (PCNS)	chemical gas expansion and chemical etching process	a regular 3D interconnected framework composed of carbon nanosheets	Yes - N,O, S	Yes	516.6 m2 g−1	NA	119	200 W kg−1	hierarchically porous carbon (HPC)	Pyrolysis of KOH and soy protein	a hierarchical porous structure with abundant micropores and mesopores (Figs.	NA	No	2717.8 m2 g−1	NA	20000	53 Wh kg−1	Yes, with modfication in synthesis	1 M NaClO4 EC:DMC with 5% FEC	No	0.0-4.0 V	Total mass of active materials of cathode and anode	Yes-anode	20
All-Cellulose-Based Quasi-Solid-State Sodium-Ion Hybrid Capacitors Enabled by Structural Hierarchy	Symmetric electrodes (with modification)	nonporous hard carbon (CNC1000)	Direct thermal pyrolysis of cellulose nanocrystals	hierarchically nanostructured	Yes - N,O	Yes	21 m2 g−1	NA	139	478 W kg-1	coral-shape N-doped carbons (CHKM800)	KHCO3 and melamine coactivation of hydro- chars produced from cellulose microfibers at 800 °C.	a hierarchically porous architecture	Yes-N	Yes	2137 m2 g−1	NA	3240	12 Wh kg−1	Yes, with modfication in synthesis	Hydroxyethylcellulose based gel polymer electrolyte	No	1.3-4.2 V	Total mass of active materials of cathode and anode	Yes-anode	21
Low
Medium
High
Lithium and sodium ion capacitors with high energy and power densities based on carbons from recycled olive pits	hard carbon
MgO-templated carbon as a negative electrode material for Na-ion capacitors	hard carbon
Molecular cooperative assembly-mediated synthesis of ultra-high-performance hard carbon anodes for dual-carbon sodium hybrid capacitors	hard carbon
Na-ion capacitor using sodium pre-doped hard carbon and activated carbon (Hard carbon)	hard carbon

## Sheet: Energy
Paper	Classification	Anode									Cathode									Capacitor properties
		Name	Synthesis	Morphology	Presence of functional groups	Nano (Y/N)	Surface area	Rate of max energy	Max energy density	Power at max energy	Name	Synthesis	Morphology	Presence of functional groups	Nano (Y/N)	Surface area	Rate of max power	Max power density	Energy at max power	Symmetric (Y/N)	Electrolyte	Double activation	Voltage range	Mass considered	Pre-sodiation (Y/N)
Peanut shell hybrid sodium ion capacitor with extreme energy-power rivals lithium ion capacitors	hard carbon	Peanut shell ordered carbon	Carbonisation followed by mild air activation	macroscopically open sponge	Yes- N,O	No	476 m2g-1	NA	214	NA	Peanut shell nanosheet carbon	Hydrothermal reaction followed by KOH activation	Nanosheet structure	Yes- N,O	Yes	2396 m2g-1	NA	16500	NA	No	1 M NaClO4 in EC:DMC	Yes	1.5-4.2	Total mass of active materials of cathode and anode	Yes - both	4
A Quasi-Solid-State Sodium-Ion Capacitor with High Energy Density	hard carbon	Nanosized disordered carbon	carbonization-activation of polypyrrole (PPy) with KOH	Nanoporous structure	No	Yes	583 m 2 g −1	NA	168	~550 W kg-1	3D macro graphene	a microwave-assisted electro- chemical exfoliation in aqueous electrolyte combined with hard template method	Nanosheets	No	yes	615 m 2 g −1	NA	2632	~45 Wh kg-1	No	Na conducting gel polymer electrolyte	No	0.5-4.2 V	Total mass of posititve and negative electrodes	NA	3
High-Performance Sodium-Ion Capacitor Constructed by Well-Matched Dual-Carbon Electrodes from a Single Biomass	Symmetric electrodes (with modification)	garlic-derived hard carbon (GDHC)	Carbonisation of garlic at high temperatures	pseudographitic ordering domains in the carbon structure	Yes - N,O, S	No	50	NA	156	355 W kg−1	garlic-derived porous carbon (GDPC)	Simple carbonization of garlic, followed by the traditional KOH activation method	Highly porous structure	Yes - N,O, S	No	1682	NA	38910	31 W h kg−1	Yes, with modfication in synthesis	1 M NaClO4 EC:DEC with 5% FEC	No	1.5-4.2 V	NA	NA	19
All-Cellulose-Based Quasi-Solid-State Sodium-Ion Hybrid Capacitors Enabled by Structural Hierarchy	Symmetric electrodes (with modification)	nonporous hard carbon (CNC1000)	Direct thermal pyrolysis of cellulose nanocrystals	hierarchically nanostructured	Yes - N,O	Yes	21 m2 g−1	NA	139	478 W kg-1	coral-shape N-doped carbons (CHKM800)	KHCO3 and melamine coactivation of hydro- chars produced from cellulose microfibers at 800 °C.	a hierarchically porous architecture	Yes-N	Yes	2137 m2 g−1	NA	3240	12 Wh kg−1	Yes, with modfication in synthesis	Hydroxyethylcellulose based gel polymer electrolyte	No	1.3-4.2 V	Total mass of active materials of cathode and anode	Yes-anode	21
Asymmetric Energy Storage Devices Based on Surface-Driven Sodium-Ion Storage	Carbon nanosheets	Hierarchically porous carbon nanowebs (HP- CNWs)	Incubation of bacteria, freeze drying and pyrolysis	highly defective pseudographitic layers	Yes - O	Yes	123.2 m2 g−1	0.1 A g-1	131	210 W kg-1	Functionalised microporous carbon nanosheets (FM-CNS)	solvation, freeze drying, followed by pyrolysis	Nanosheets	Yes - N,O	Yes	1,764.8 m2 g−1	8 A g-1	15260	~44 Wh kg-1	No	1 M NaPF6 in EC:PC	No	0.4-4.2 V	NA	Yes - both	6
Surface-Functionalized Graphene-Based Quasi-Solid-State Na-Ion Hybrid Capacitors with Excellent Performance	Symmetric electrodes (without modification)	surface oxygen -functionalized crumbled graphene (OCG)	Low-temperature calcination of composite material fabricated by in-situ grown Zinc oxide nanosheets (ZnO) on the surface of GO	compact graphene/ZnO composite with porous ZnO nanosheets strongly an- chored on the surface of graphene	Yes - O	yes	254 m2 g−1	NA	121.3	300 W kg−1	surface oxygen -functionalized crumbled graphene (OCG)	Low-temperature calcination of composite material fabricated by in-situ grown Zinc oxide nanosheets (ZnO) on the surface of GO	compact graphene/ZnO composite with porous ZnO nanosheets strongly an- chored on the surface of graphene	Yes - O	yes	254 m2 g−1	NA	8000	51.2 W h kg−1	Yes	Na conducting gel polymer electrolyte	Yes	0.5-3.5 V	Total mass of active materials of cathode and anode	NA	16
Surface Enriched Graphene Hollow Spheres towards Building Ultra-High Power Sodium-Ion Capacitor with Long Durability	Symmetric electrodes (without modification)	Highly interconnected graphene hollow nanospheres (GHNS) with dual heteroatoms - nitrogen (N) and sulfur (S)	sacrificial template method for the self-assembly of N and S doped 2D graphene into 3-D hollow architecture	hollow nanosphere morphology	Yes - N,O, S	Yes	~320m2 g?1	NA	121	100Wkg?1	Highly interconnected graphene hollow nanospheres (GHNS) with dual heteroatoms - nitrogen (N) and sulfur (S)	sacrificial template method for the self-assembly of N and S doped 2D graphene into 3-D hollow architecture	hollow nanosphere morphology of	Yes - N,O, S	Yes	~320m2 g?1	NA	51000	69 Wh kg?1	Yes	1 M NaClO4 in EC:DEC	Yes	1.5-4.2 V	Total mass of active materials of cathode and anode	Yes-both	17
Gas Expansion-Assisted Preparation of 3D Porous Carbon Nanosheet for High-Performance Sodium Ion Hybrid Capacitor	Symmetric electrodes (with modification)	3-D N, S co-doped porous carbon nanosheet (PCNS)	chemical gas expansion and chemical etching process	a regular 3D interconnected framework composed of carbon nanosheets	Yes - N,O, S	Yes	516.6 m2 g−1	NA	119	200 W kg−1	hierarchically porous carbon (HPC)	Pyrolysis of KOH and soy protein	a hierarchical porous structure with abundant micropores and mesopores (Figs.	NA	No	2717.8 m2 g−1	NA	20000	53 Wh kg−1	Yes, with modfication in synthesis	1 M NaClO4 EC:DMC with 5% FEC	No	0.0-4.0 V	Total mass of active materials of cathode and anode	Yes-anode	20
A high-energy sodium-ion capacitor enabled by a nitrogen/sulfur co-doped hollow carbon nanofiber anode and an activated carbon cathode	carbon nanofiber/sphere	Nitrogen, sulfur co-doped hierarchal hollow carbon nanofibers (N/S-HCNFs)	Solution based method followed by pyrolysis	nanofibers with hollow structure	Yes - N, S	Yes	397.7 m2 g?1	NA	116.4	200Wkg?1	activated carbon	commercially obtained	NA	NA	No	NA	NA	20000	48.2 W h kg?1	No	1 m NaClO4 in EC:DMC+FEC (5 wt.%)	No	0.0-4.0 V	Total mass of active materials of cathode and anode	Yes - anode	11
Sodium-Ion Diffusion and Charge Transfer Kinetics of Sodium-Ion Hybrid Capacitors Using Bio-Derived Hierarchical Porous Carbon	Symmetric electrodes (without modification)	hierarchical porous carbon (j-HPC)	Pre-carbonisation, low-temperature KOH activation, followed by high-temperature carbonisation	a granule-like irregular morphology	Yes - N,O	No	2377m2 g?1	NA	116	495.43Wkg?1	hierarchical porous carbon (HPC)	Pre-carbonisation, low-temperature KOH activation, followed by high-temperature carbonisation	a granule-like irregular morphology	Yes - N,O	No	2377m2 g?1	NA	11121	34.78Wh kg?1	Yes	1M NaPF6 in EC:DEC	Yes	1.0-3.8V	Total mass of active materials of cathode and anode	Yes- both	15
Excellent energy – power characteristics from a hybrid sodium ion capacitor based on identical carbon nanosheets in both electrodes	Symmetric electrodes (without modification)	peanut skin-derived carbon nanosheets (SCN-A)	simultaneous carbonization and activation	Nanometer-scale sheet like morphology	Yes - N,O	Yes	2070 m2 g-1	NA	112	67	peanut skin-derived carbon nanosheets (SCN-A)	simultaneous carbonization and activation	Nanometer-scale sheet like morphology	Yes - N,O	Yes	2070 m2 g-1	NA	12000	45	Yes	1 M NaClO4 in EC:DEC	Yes	0.0-4.0 V	Total mass of active materials of cathode and anode	Yes- both	13
High and ultra-stable energy storage from all-carbon sodium-ion capacitor with 3D framework carbon as cathode and carbon nanosheet as anode	Carbon nanosheets	Bio-waste pine cone shell derived carbon sheets (PSCS)	Pre-carbonization followed by carbonisation coupled with KOH activation	carbon nanosheet structure with long-range disordering	NA	Yes	63.3	NA	111	40 W kg-1	(4,4′-(4-oxophthalazine-1,3(4H)-diyl)dibenzonitrile covalent triazine-based frameworks (OPDN-CTF-A)	ionothermal strategy	abundant and homogeneous pores without pseudo-graphite layered structure	Yes - N,O	No	687.4	NA	14200	86 Wh kg-1	No	1 m NaClO4 in EC:DEC+FEC (5 Vol%)	No	1.5-4.2 V	Total mass of active materials of cathode and anode	Yes - both	8
Ultra-Thin Hollow Carbon Nanospheres for Pseudocapacitive Sodium-Ion Storage	carbon nanofiber/sphere	Ultra-thin hollow carbon nanospheres (UTH-CNs)	Template based method followed by pyrolysis	Hollow morphology	Yes - N,O	Yes	400 m2 g?1	NA	110	245 Wkg?1	activated carbon	commercially obtained	NA	NA	No	NA	NA	10000	43 Whkg?1	No	1 M NaClO4 in PC	No	0.5-4.0 V	Total mass of anode and cathode	Yes - anode	10
Waste-Driven Bio-Carbon Electrode Material for Na-Ion Storage Applications	Symmetric electrodes (without modification)	corn silk derived activated carbon (CSC)	Pre-carbonization followed by carbonisation coupled with KOH activation	sheet like structure with random orientation	Yes - N,O	No	2550 m2 g-1	NA	109	1.6 kW kg-1	corn silk derived activated carbon (CSC)	Pre-carbonization followed by carbonisation coupled with KOH activation	sheet like structure with random orientation	Yes - N,O	No	2550 m2 g-1	NA	12160	43.57 Wh kg-1	Yes	1M NaClO4 in EC: PC	Yes	0.01-2.5 V	NA	NA	14
Tremella-like N,O-codoped hierarchically porous carbon nanosheets as high performance anode materials for high energy and ultrafast Na-ion capacitors	Carbon nanosheets	Tremella-like hierarchically porous carbon nanosheets (HPCNS)	Pre-carbonization followed by carbonisation coupled with KOH activation	3-D tremella-like structure composed of 2-D nanosheets	Yes- N,O	Yes	890.4	NA	105.2	700 W kg−1	Hierarchially porous carbon	Carbonisation of cattle bones followed by combined KOH activation and pyrolysis	a 3D hierarchical honeycomb porous structure with interconnected pores containing open macropores and channel mesopores	Yes- N,O	Yes	2520 m 2g -1	NA	60400	32.5 W h kg−1	No	1 m NaClO4 in EC:DMC+FEC (5 Vol%)	Yes	0.0-4.0 V	Total mass of active materials of cathode and anode	Yes-anode	7
Porous Carbons with Tailored Heteroatom Doping and Well-Defined Porosity as High-Performance Electrodes for Robust Na-Ion Capacitors	Symmetric electrodes (with modification)	N, O co-doped hierarchically porous carbon materials (HPC - 550)	precarbonisation followed by pyrolysis coupled with KOH+hydroxyapatite activation	honeycomb-like structure with rich interconnected macropores	Yes - N,O	yes	594	NA	103.2	70Wkg−1	N, O co-doped hierarchically porous carbon materials (HPC - 800)	precarbonisation followed by pyrolysis coupled with KOH+hydroxyapatite activation	honeycomb-like structure with rich interconnected macropores	Yes - N,O	Yes	3285	NA	15900	22.3Wh kg−1	Yes, with modfication in synthesis	1M NaClO4 in EC: PC with 5% FEC	Yes	0.0-4.0 V	Total mass of active materials of cathode and anode	Yes- anode	18
Modulating the defects of graphene blocks by ball-milling for ultrahigh gravimetric and volumetric performance and fast sodium storage	Carbon nanosheets	Dense graphene blocks	Planetary ball milling	broken and distorted lattice with abundant de- fects	Yes - O	Yes	65.8 m2 g?1	NA	97	318	Activated carbon	commercially obtained (AC- YP-80, Kuraray)	NA	NA	No	NA	NA	14205	45	No	1M NaCF3SO3 in diglyme	No	0-3.2 V	Total mass of active materials of cathode and anode	NA	9
High energy density sodium-ion capacitors through co-intercalation mechanism in diglyme-based electrolyte system (Graphite MCMB)	Graphite MCMB	mesocarbon microbead graphite (MCMB graphite)	commercial	Graphitic structure	No	No	NA	4C	93.5	573 W kg-1	Activated carbon	Commercial (AC- YP50F, Kuraray)	NA	No	No	1373 m2 g-1	20 C	2832	86.5 Wh kg-1	No	1M NaPF6 in diglyme	No	1-4 V	NA	Yes	2
Li-ion vs. Na-ion capacitors: A performance evaluation with coconut shell derived mesoporous carbon and natural plant based hard carbon (Capacitor type)	Capacitor type	natural plant based HC	commercial	NA	No	No	NA	NA	82	NA	Coconut shell derived mesoporous carbon (CS-AC)	hydrothermal treatment of coconut shell precursor at 200˚C for 20 min and subsequent physiochemical activation using ZnCl2 and CO2 as chemical and physical activating agents.	granular shaped particulate	Yes - O	NA	1795 m2 g?1	NA	8000	NA	No	1 M NaClO4 in EC:DMC	No	1.4-3.9 V	Total mass of active materials of cathode and anode(mass loading 1:2.2)	Yes - only HC	12
Sodium-ion capacitors with superior energy-power performance by using carbon-based materials in both electrodes (hard carbon)	hard carbon	(polyimide/graphene oxide)-derived carbon (PIGC)	Hydrothermal reaction followed by pyrolysis	Plate like morphology with graphitised domains	Yes - N,O	No	512 m2 g−1,	NA	81	600 W kg-1	N, B-codoped expanded reduced graphite oxide (NBEG)	Pristine expanded graphite was heated with boric acid and NH3 to prepare NBEG	NA	Yes - N,B	No	NA	NA	9500	55 W h kg-1	No	1 M NaClO4 in EC:DMC	No	0-4.2 V	Mass of anode material	No	5
High-Power Na-Ion and K-Ion Hybrid Capacitors Exploiting Co-Intercalation in Graphite Negative Electrodes (graphite MCMB)	Graphite MCMB	Micro-sized graphite	commercial	Graphitic structure	No	No	7.24 m2 g-1	NA	60.5	1422 W kg-1	Activated carbon	Commercial (AC- YP-47, Kuraray)	NA	No	No	NA	NA	17127	21.8 Wh kg-1	No	1M NaPF6 in diglyme	No	0-3.9 V	Mass of anode and cathode active materials	No	1

## Sheet: Power
Paper	Classification	Anode									Cathode									Capacitor properties
		Name	Synthesis	Morphology	Presence of functional groups	Nano (Y/N)	Surface area	Rate of max energy	Max energy density	Power at max energy	Name	Synthesis	Morphology	Presence of functional groups	Nano (Y/N)	Surface area	Rate of max power	Max power density	Energy at max power	Symmetric (Y/N)	Electrolyte	Double activation	Voltage range	Mass considered	Pre-sodiation (Y/N)
Tremella-like N,O-codoped hierarchically porous carbon nanosheets as high performance anode materials for high energy and ultrafast Na-ion capacitors	Carbon nanosheets	Tremella-like hierarchically porous carbon nanosheets (HPCNS)	Pre-carbonization followed by carbonisation coupled with KOH activation	3-D tremella-like structure composed of 2-D nanosheets	Yes- N,O	Yes	890.4	NA	105.2	700 W kg−1	Hierarchially porous carbon	Carbonisation of cattle bones followed by combined KOH activation and pyrolysis	a 3D hierarchical honeycomb porous structure with interconnected pores containing open macropores and channel mesopores	Yes- N,O	Yes	2520 m 2g -1	NA	60400	32.5 W h kg−1	No	1 m NaClO4 in EC:DMC+FEC (5 Vol%)	Yes	0.0-4.0 V	Total mass of active materials of cathode and anode	Yes-anode	7
Surface Enriched Graphene Hollow Spheres towards Building Ultra-High Power Sodium-Ion Capacitor with Long Durability	Symmetric electrodes (without modification)	Highly interconnected graphene hollow nanospheres (GHNS) with dual heteroatoms - nitrogen (N) and sulfur (S)	sacrificial template method for the self-assembly of N and S doped 2D graphene into 3-D hollow architecture	hollow nanosphere morphology	Yes - N,O, S	Yes	~320m2 g?1	NA	121	100Wkg?1	Highly interconnected graphene hollow nanospheres (GHNS) with dual heteroatoms - nitrogen (N) and sulfur (S)	sacrificial template method for the self-assembly of N and S doped 2D graphene into 3-D hollow architecture	hollow nanosphere morphology of	Yes - N,O, S	Yes	~320m2 g?1	NA	51000	69 Wh kg?1	Yes	1 M NaClO4 in EC:DEC	Yes	1.5-4.2 V	Total mass of active materials of cathode and anode	Yes-both	17
High-Performance Sodium-Ion Capacitor Constructed by Well-Matched Dual-Carbon Electrodes from a Single Biomass	Symmetric electrodes (with modification)	garlic-derived hard carbon (GDHC)	Carbonisation of garlic at high temperatures	pseudographitic ordering domains in the carbon structure	Yes - N,O, S	No	50	NA	156	355 W kg−1	garlic-derived porous carbon (GDPC)	Simple carbonization of garlic, followed by the traditional KOH activation method	Highly porous structure	Yes - N,O, S	No	1682	NA	38910	31 W h kg−1	Yes, with modfication in synthesis	1 M NaClO4 EC:DEC with 5% FEC	No	1.5-4.2 V	NA	NA	19
A high-energy sodium-ion capacitor enabled by a nitrogen/sulfur co-doped hollow carbon nanofiber anode and an activated carbon cathode	carbon nanofiber/sphere	Nitrogen, sulfur co-doped hierarchal hollow carbon nanofibers (N/S-HCNFs)	Solution based method followed by pyrolysis	nanofibers with hollow structure	Yes - N, S	Yes	397.7 m2 g?1	NA	116.4	200Wkg?1	activated carbon	commercially obtained	NA	NA	No	NA	NA	20000	48.2 W h kg?1	No	1 m NaClO4 in EC:DMC+FEC (5 wt.%)	No	0.0-4.0 V	Total mass of active materials of cathode and anode	Yes - anode	11
Gas Expansion-Assisted Preparation of 3D Porous Carbon Nanosheet for High-Performance Sodium Ion Hybrid Capacitor	Symmetric electrodes (with modification)	3-D N, S co-doped porous carbon nanosheet (PCNS)	chemical gas expansion and chemical etching process	a regular 3D interconnected framework composed of carbon nanosheets	Yes - N,O, S	Yes	516.6 m2 g−1	NA	119	200 W kg−1	hierarchically porous carbon (HPC)	Pyrolysis of KOH and soy protein	a hierarchical porous structure with abundant micropores and mesopores (Figs.	NA	No	2717.8 m2 g−1	NA	20000	53 Wh kg−1	Yes, with modfication in synthesis	1 M NaClO4 EC:DMC with 5% FEC	No	0.0-4.0 V	Total mass of active materials of cathode and anode	Yes-anode	20
High-Power Na-Ion and K-Ion Hybrid Capacitors Exploiting Co-Intercalation in Graphite Negative Electrodes (graphite MCMB)	Graphite MCMB	Micro-sized graphite	commercial	Graphitic structure	No	No	7.24 m2 g-1	NA	60.5	1422 W kg-1	Activated carbon	Commercial (AC- YP-47, Kuraray)	NA	No	No	NA	NA	17127	21.8 Wh kg-1	No	1M NaPF6 in diglyme	No	0-3.9 V	Mass of anode and cathode active materials	No	1
Peanut shell hybrid sodium ion capacitor with extreme energy-power rivals lithium ion capacitors	hard carbon	Peanut shell ordered carbon	Carbonisation followed by mild air activation	macroscopically open sponge	Yes- N,O	No	476 m2g-1	NA	214	NA	Peanut shell nanosheet carbon	Hydrothermal reaction followed by KOH activation	Nanosheet structure	Yes- N,O	Yes	2396 m2g-1	NA	16500	NA	No	1 M NaClO4 in EC:DMC	Yes	1.5-4.2	Total mass of active materials of cathode and anode	Yes - both	4
Porous Carbons with Tailored Heteroatom Doping and Well-Defined Porosity as High-Performance Electrodes for Robust Na-Ion Capacitors	Symmetric electrodes (with modification)	N, O co-doped hierarchically porous carbon materials (HPC - 550)	precarbonisation followed by pyrolysis coupled with KOH+hydroxyapatite activation	honeycomb-like structure with rich interconnected macropores	Yes - N,O	yes	594	NA	103.2	70Wkg−1	N, O co-doped hierarchically porous carbon materials (HPC - 800)	precarbonisation followed by pyrolysis coupled with KOH+hydroxyapatite activation	honeycomb-like structure with rich interconnected macropores	Yes - N,O	Yes	3285	NA	15900	22.3Wh kg−1	Yes, with modfication in synthesis	1M NaClO4 in EC: PC with 5% FEC	Yes	0.0-4.0 V	Total mass of active materials of cathode and anode	Yes- anode	18
Asymmetric Energy Storage Devices Based on Surface-Driven Sodium-Ion Storage	Carbon nanosheets	Hierarchically porous carbon nanowebs (HP- CNWs)	Incubation of bacteria, freeze drying and pyrolysis	highly defective pseudographitic layers	Yes - O	Yes	123.2 m2 g−1	0.1 A g-1	131	210 W kg-1	Functionalised microporous carbon nanosheets (FM-CNS)	solvation, freeze drying, followed by pyrolysis	Nanosheets	Yes - N,O	Yes	1,764.8 m2 g−1	8 A g-1	15260	~44 Wh kg-1	No	1 M NaPF6 in EC:PC	No	0.4-4.2 V	NA	Yes - both	6
Modulating the defects of graphene blocks by ball-milling for ultrahigh gravimetric and volumetric performance and fast sodium storage	Carbon nanosheets	Dense graphene blocks	Planetary ball milling	broken and distorted lattice with abundant de- fects	Yes - O	Yes	65.8 m2 g?1	NA	97	318	Activated carbon	commercially obtained (AC- YP-80, Kuraray)	NA	NA	No	NA	NA	14205	45	No	1M NaCF3SO3 in diglyme	No	0-3.2 V	Total mass of active materials of cathode and anode	NA	9
High and ultra-stable energy storage from all-carbon sodium-ion capacitor with 3D framework carbon as cathode and carbon nanosheet as anode	Carbon nanosheets	Bio-waste pine cone shell derived carbon sheets (PSCS)	Pre-carbonization followed by carbonisation coupled with KOH activation	carbon nanosheet structure with long-range disordering	NA	Yes	63.3	NA	111	40 W kg-1	(4,4′-(4-oxophthalazine-1,3(4H)-diyl)dibenzonitrile covalent triazine-based frameworks (OPDN-CTF-A)	ionothermal strategy	abundant and homogeneous pores without pseudo-graphite layered structure	Yes - N,O	No	687.4	NA	14200	86 Wh kg-1	No	1 m NaClO4 in EC:DEC+FEC (5 Vol%)	No	1.5-4.2 V	Total mass of active materials of cathode and anode	Yes - both	8
Waste-Driven Bio-Carbon Electrode Material for Na-Ion Storage Applications	Symmetric electrodes (without modification)	corn silk derived activated carbon (CSC)	Pre-carbonization followed by carbonisation coupled with KOH activation	sheet like structure with random orientation	Yes - N,O	No	2550 m2 g-1	NA	109	1.6 kW kg-1	corn silk derived activated carbon (CSC)	Pre-carbonization followed by carbonisation coupled with KOH activation	sheet like structure with random orientation	Yes - N,O	No	2550 m2 g-1	NA	12160	43.57 Wh kg-1	Yes	1M NaClO4 in EC: PC	Yes	0.01-2.5 V	NA	NA	14
Excellent energy – power characteristics from a hybrid sodium ion capacitor based on identical carbon nanosheets in both electrodes	Symmetric electrodes (without modification)	peanut skin-derived carbon nanosheets (SCN-A)	simultaneous carbonization and activation	Nanometer-scale sheet like morphology	Yes - N,O	Yes	2070 m2 g-1	NA	112	67	peanut skin-derived carbon nanosheets (SCN-A)	simultaneous carbonization and activation	Nanometer-scale sheet like morphology	Yes - N,O	Yes	2070 m2 g-1	NA	12000	45	Yes	1 M NaClO4 in EC:DEC	Yes	0.0-4.0 V	Total mass of active materials of cathode and anode	Yes- both	13
Sodium-Ion Diffusion and Charge Transfer Kinetics of Sodium-Ion Hybrid Capacitors Using Bio-Derived Hierarchical Porous Carbon	Symmetric electrodes (without modification)	hierarchical porous carbon (j-HPC)	Pre-carbonisation, low-temperature KOH activation, followed by high-temperature carbonisation	a granule-like irregular morphology	Yes - N,O	No	2377m2 g?1	NA	116	495.43Wkg?1	hierarchical porous carbon (HPC)	Pre-carbonisation, low-temperature KOH activation, followed by high-temperature carbonisation	a granule-like irregular morphology	Yes - N,O	No	2377m2 g?1	NA	11121	34.78Wh kg?1	Yes	1M NaPF6 in EC:DEC	Yes	1.0-3.8V	Total mass of active materials of cathode and anode	Yes- both	15
Ultra-Thin Hollow Carbon Nanospheres for Pseudocapacitive Sodium-Ion Storage	carbon nanofiber/sphere	Ultra-thin hollow carbon nanospheres (UTH-CNs)	Template based method followed by pyrolysis	Hollow morphology	Yes - N,O	Yes	400 m2 g?1	NA	110	245 Wkg?1	activated carbon	commercially obtained	NA	NA	No	NA	NA	10000	43 Whkg?1	No	1 M NaClO4 in PC	No	0.5-4.0 V	Total mass of anode and cathode	Yes - anode	10
Sodium-ion capacitors with superior energy-power performance by using carbon-based materials in both electrodes (hard carbon)	hard carbon	(polyimide/graphene oxide)-derived carbon (PIGC)	Hydrothermal reaction followed by pyrolysis	Plate like morphology with graphitised domains	Yes - N,O	No	512 m2 g−1,	NA	81	600 W kg-1	N, B-codoped expanded reduced graphite oxide (NBEG)	Pristine expanded graphite was heated with boric acid and NH3 to prepare NBEG	NA	Yes - N,B	No	NA	NA	9500	55 W h kg-1	No	1 M NaClO4 in EC:DMC	No	0-4.2 V	Mass of anode material	No	5
Li-ion vs. Na-ion capacitors: A performance evaluation with coconut shell derived mesoporous carbon and natural plant based hard carbon (Capacitor type)	Capacitor type	natural plant based HC	commercial	NA	No	No	NA	NA	82	NA	Coconut shell derived mesoporous carbon (CS-AC)	hydrothermal treatment of coconut shell precursor at 200˚C for 20 min and subsequent physiochemical activation using ZnCl2 and CO2 as chemical and physical activating agents.	granular shaped particulate	Yes - O	NA	1795 m2 g?1	NA	8000	NA	No	1 M NaClO4 in EC:DMC	No	1.4-3.9 V	Total mass of active materials of cathode and anode(mass loading 1:2.2)	Yes - only HC	12
Surface-Functionalized Graphene-Based Quasi-Solid-State Na-Ion Hybrid Capacitors with Excellent Performance	Symmetric electrodes (without modification)	surface oxygen -functionalized crumbled graphene (OCG)	Low-temperature calcination of composite material fabricated by in-situ grown Zinc oxide nanosheets (ZnO) on the surface of GO	compact graphene/ZnO composite with porous ZnO nanosheets strongly an- chored on the surface of graphene	Yes - O	yes	254 m2 g−1	NA	121.3	300 W kg−1	surface oxygen -functionalized crumbled graphene (OCG)	Low-temperature calcination of composite material fabricated by in-situ grown Zinc oxide nanosheets (ZnO) on the surface of GO	compact graphene/ZnO composite with porous ZnO nanosheets strongly an- chored on the surface of graphene	Yes - O	yes	254 m2 g−1	NA	8000	51.2 W h kg−1	Yes	Na conducting gel polymer electrolyte	Yes	0.5-3.5 V	Total mass of active materials of cathode and anode	NA	16
All-Cellulose-Based Quasi-Solid-State Sodium-Ion Hybrid Capacitors Enabled by Structural Hierarchy	Symmetric electrodes (with modification)	nonporous hard carbon (CNC1000)	Direct thermal pyrolysis of cellulose nanocrystals	hierarchically nanostructured	Yes - N,O	Yes	21 m2 g−1	NA	139	478 W kg-1	coral-shape N-doped carbons (CHKM800)	KHCO3 and melamine coactivation of hydro- chars produced from cellulose microfibers at 800 °C.	a hierarchically porous architecture	Yes-N	Yes	2137 m2 g−1	NA	3240	12 Wh kg−1	Yes, with modfication in synthesis	Hydroxyethylcellulose based gel polymer electrolyte	No	1.3-4.2 V	Total mass of active materials of cathode and anode	Yes-anode	21
High energy density sodium-ion capacitors through co-intercalation mechanism in diglyme-based electrolyte system (Graphite MCMB)	Graphite MCMB	mesocarbon microbead graphite (MCMB graphite)	commercial	Graphitic structure	No	No	NA	4C	93.5	573 W kg-1	Activated carbon	Commercial (AC- YP50F, Kuraray)	NA	No	No	1373 m2 g-1	20 C	2832	86.5 Wh kg-1	No	1M NaPF6 in diglyme	No	1-4 V	NA	Yes	2
A Quasi-Solid-State Sodium-Ion Capacitor with High Energy Density	hard carbon	Nanosized disordered carbon	carbonization-activation of polypyrrole (PPy) with KOH	Nanoporous structure	No	Yes	583 m 2 g −1	NA	168	~550 W kg-1	3D macro graphene	a microwave-assisted electro- chemical exfoliation in aqueous electrolyte combined with hard template method	Nanosheets	No	yes	615 m 2 g −1	NA	2632	~45 Wh kg-1	No	Na conducting gel polymer electrolyte	No	0.5-4.2 V	Total mass of posititve and negative electrodes	NA	3

## Sheet: Sheet1
Paper	Classification	Anode									Cathode									Capacitor properties
		Name	Synthesis	Morphology	Presence of functional groups	Nano (Y/N)	Surface area	Rate of max energy	Max energy density	Power at max energy	Name	Synthesis	Morphology	Presence of functional groups	Nano (Y/N)	Surface area	Rate of max power	Max power density	Energy at max power	Symmetric (Y/N)	Electrolyte	Double activation	Voltage range	Mass considered	Pre-sodiation (Y/N)
High-Performance Sodium-Ion Capacitor Constructed by Well-Matched Dual-Carbon Electrodes from a Single Biomass	Symmetric electrodes (with modification)	garlic-derived hard carbon (GDHC)	Carbonisation of garlic at high temperatures	pseudographitic ordering domains in the carbon structure	Yes - N,O, S	No	50	NA	156	355 W kg−1	garlic-derived porous carbon (GDPC)	Simple carbonization of garlic, followed by the traditional KOH activation method	Highly porous structure	Yes - N,O, S	No	1682	NA	38910	31 W h kg−1	Yes, with modfication in synthesis	1 M NaClO4 EC:DEC with 5% FEC	No	1.5-4.2 V	NA	NA	19
A high-energy sodium-ion capacitor enabled by a nitrogen/sulfur co-doped hollow carbon nanofiber anode and an activated carbon cathode	carbon nanofiber/sphere	Nitrogen, sulfur co-doped hierarchal hollow carbon nanofibers (N/S-HCNFs)	Solution based method followed by pyrolysis	nanofibers with hollow structure	Yes - N, S	Yes	397.7 m2 g?1	NA	116.4	200Wkg?1	activated carbon	commercially obtained	NA	NA	No	NA	NA	20000	48.2 W h kg?1	No	1 m NaClO4 in EC:DMC+FEC (5 wt.%)	No	0.0-4.0 V	Total mass of active materials of cathode and anode	Yes - anode	11
Porous Carbons with Tailored Heteroatom Doping and Well-Defined Porosity as High-Performance Electrodes for Robust Na-Ion Capacitors	Symmetric electrodes (with modification)	N, O co-doped hierarchically porous carbon materials (HPC - 550)	precarbonisation followed by pyrolysis coupled with KOH+hydroxyapatite activation	honeycomb-like structure with rich interconnected macropores	Yes - N,O	yes	594	NA	103.2	70Wkg−1	N, O co-doped hierarchically porous carbon materials (HPC - 800)	precarbonisation followed by pyrolysis coupled with KOH+hydroxyapatite activation	honeycomb-like structure with rich interconnected macropores	Yes - N,O	Yes	3285	NA	15900	22.3Wh kg−1	Yes, with modfication in synthesis	1M NaClO4 in EC: PC with 5% FEC	Yes	0.0-4.0 V	Total mass of active materials of cathode and anode	Yes- anode	18
Modulating the defects of graphene blocks by ball-milling for ultrahigh gravimetric and volumetric performance and fast sodium storage	Carbon nanosheets	Dense graphene blocks	Planetary ball milling	broken and distorted lattice with abundant de- fects	Yes - O	yes	65.8 m2 g?1	NA	97	318	Activated carbon	commercially obtained (AC- YP-80, Kuraray)	NA	NA	No	NA	NA	14205	45	No	1M NaCF3SO3 in diglyme	No	0-3.2 V	Total mass of active materials of cathode and anode	NA	9
Sodium-ion capacitors with superior energy-power performance by using carbon-based materials in both electrodes (hard carbon)	hard carbon	(polyimide/graphene oxide)-derived carbon (PIGC)	Hydrothermal reaction followed by pyrolysis	Plate like morphology with graphitised domains	Yes - N,O	No	512 m2 g−1,	NA	81	600 W kg-1	N, B-codoped expanded reduced graphite oxide (NBEG)	Pristine expanded graphite was heated with boric acid and NH3 to prepare NBEG	NA	Yes - N,B	No	NA	NA	9500	55 W h kg-1	No	1 M NaClO4 in EC:DMC	No	0-4.2 V	Mass of anode material	No	5
